# Supplementary material for: Biomimetic synthesis of urchin-like CuO/ZnO nanocomposites with excellent photocatalytic activity
Source: Royal Society of Chemistry journal article supplement (doi:10.1039/c8nj02052c), 2018-01-01
Supplement: c8nj02052c1.pdf [file c8nj02052c1.pdf]

Electronic Supplementary Material (ESI) for New Journal of Chemistry.

This journal is © The Royal Society of Chemistry and the Centre National de la Recherche Scientifique 2018

## Biomimetic Synthesis of Urchin-like CuO/ZnO Nanocomposite with Excellent Photocatalytic Activity

Hui Fang, Yanxia Guo, Tong Wu, Yiping Liu\*

\*College of Chemistry, Key Laboratory of Biosensing and Molecular Recognition (Tianjin), and Key Laboratory of Advanced Energy Materials Chemistry (Ministry of Education), Nankai University, Tianjin 300071, China

### Supplementary Figures

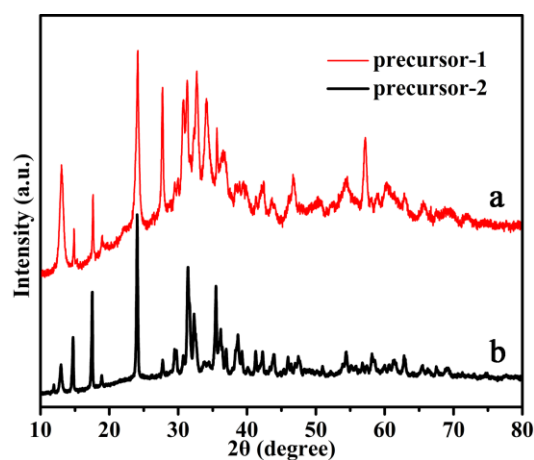

**Fig. S1** XRD patterns of the precursors of the (a) ZnCu-1 and (b) ZnCu-2 nanocomposites.

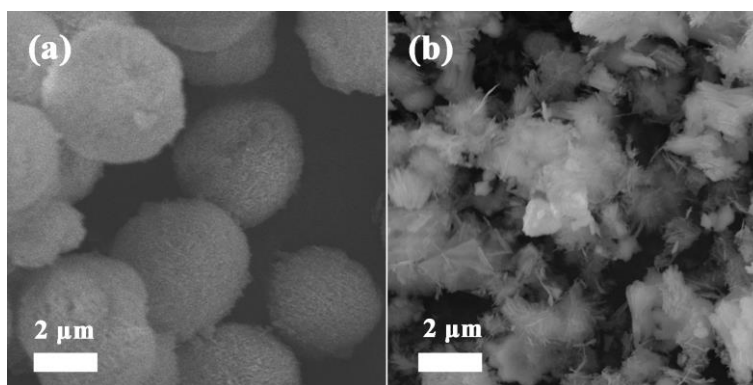

**Fig. S2** SEM images of the precursors of (a) ZnCu-1 and (b) ZnCu-2 nanocomposites.

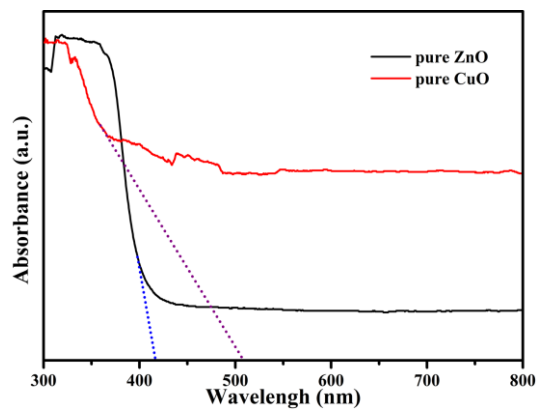

**Fig. S3** UV-Vis diffuse reflectance spectra of the pure ZnO and CuO.

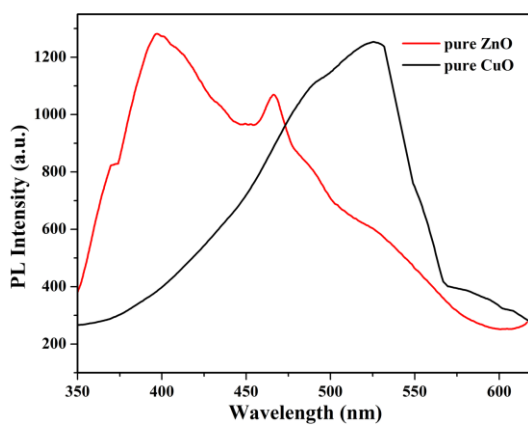

**Fig. S4** Room temperature photoluminescence spectra of the pure ZnO and CuO.
